# Supplementary material for: Comparison of the Inhibitory Potential of Bavachalcone and Corylin against UDP‐Glucuronosyltransferases
Source: Hindawi journal article supplement (doi:10.1155/2014/958937), 2014-01-01
Supplement: f1 [file 958937.f1.pdf]

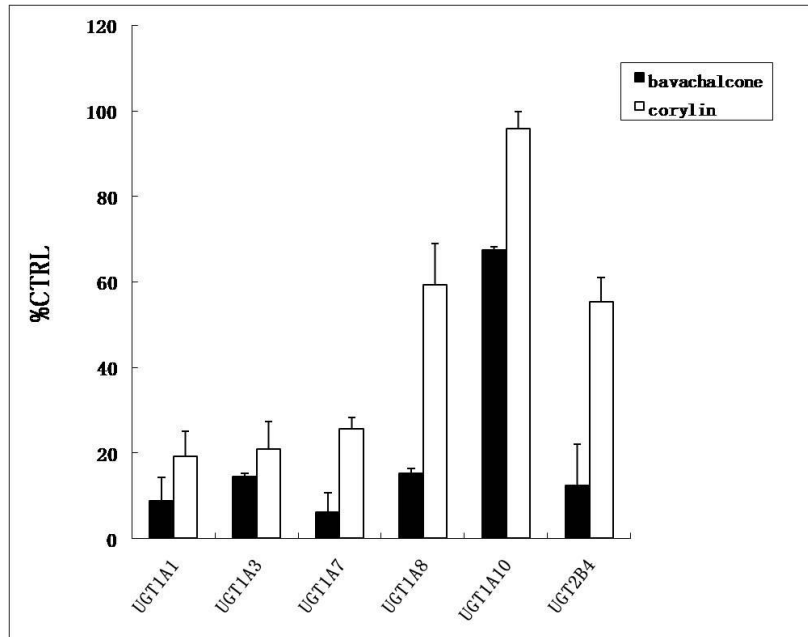

**Fig.** Inhibitory effects of bavachalcone and corylin on important UGT1A1, UGT1A3, UGT1A7, UGT1A8, UGT1A10 and UGT2B4 isoforms. Recombinant UGT isoforms were used as enzyme sources. 4-MU was utilized as probe substrate. Incubation conditions were described in the experimental section.
